# Supplementary material for: Pregnancy Gestation Impacts on HIV-1-Specific Granzyme B Response and Central Memory CD4 T Cells
Source: PubMed Central journal article supplement (PMC7027986; doi:10.3389/fimmu.2020.00153), 2020-02-11
Supplement: Data_Sheet_1.pdf [file Data_Sheet_1.pdf]

## Supplementary section

**Supplementary Table 1 – Fluorescently labelled monoclonal antibodies** This table details the fluorescently labelled monoclonal antibodies clone, manufacturer, product code and titrated volume used in this study. Antibodies used were from either Becton Dickinson (BD), BioLegend (BL), or Thermo Fisher (TF).

| Fluorochrome | Marker             | Clone     | Supplier and Product Code | Research Resource Identifier | Volume per $1 \times 10^6$ PBMC/100 $\mu$ l |
|--------------|--------------------|-----------|---------------------------|------------------------------|---------------------------------------------|
| BV650        | CD45RA             | HI100     | BD; 563963                | RRID:AB_2738514              | 3 $\mu$ l                                   |
| BV605        | CD4                | RPA-T4    | BD; 562658                | RRID:AB_2744420              | 3 $\mu$ l                                   |
| BV421        | CD28               | CD28.2    | BD; 562613                | RRID:AB_2737676              | 5 $\mu$ l                                   |
| BV421        | CD122              | TU27      | BL; 339010                | RRID:AB_2561835              | 2 $\mu$ l                                   |
| Amcyan       | Live/Dead Aqua dye | -         | TF; L34957                | -                            | 1 $\mu$ l                                   |
| FITC         | CD27               | M-T271    | BL; 356404                | RRID:AB_2561788              | 2 $\mu$ l                                   |
| PE           | CD31               | WM56      | BD; 555446                | RRID:AB_395839               | 20 $\mu$ l                                  |
| PE           | CD62-L             | DREG-56   | BL; 304806                | RRID:AB_314466               | 3 $\mu$ l                                   |
| APC          | CD4                | RPA-T4    | BD; 555349                | RRID:AB_398593               | 20 $\mu$ l                                  |
| APC          | CD95               | DX2       | BD; 558814                | RRID:AB_398659               | 10 $\mu$ l                                  |
| PE-CF594     | CD45RO             | UCHL1     | BD; 562299                | RRID:AB_11154398             | 3 $\mu$ l                                   |
| PE-Cy7       | CCR7               | 3D12      | BD; 557648                | RRID:AB_396765               | 3 $\mu$ l                                   |
| PerCP-Cy5.5  | CD3                | SK7/Leu-4 | BD; 332771                | -                            | 3 $\mu$ l                                   |
| APC-H7       | CD8                | SK1       | BD; 560179                | RRID:AB_1645481              | 3 $\mu$ l                                   |

### T-cell Panel and Controls

| BV650  | BV421 | Amcyan    | PE   | APC | PE-Cy7 | PerCP-Cy5.5 | APC-H7 |
|--------|-------|-----------|------|-----|--------|-------------|--------|
| CD45RA | CD28  | Live/Dead | CD31 | CD4 | CCR7   | CD3         | CD8    |

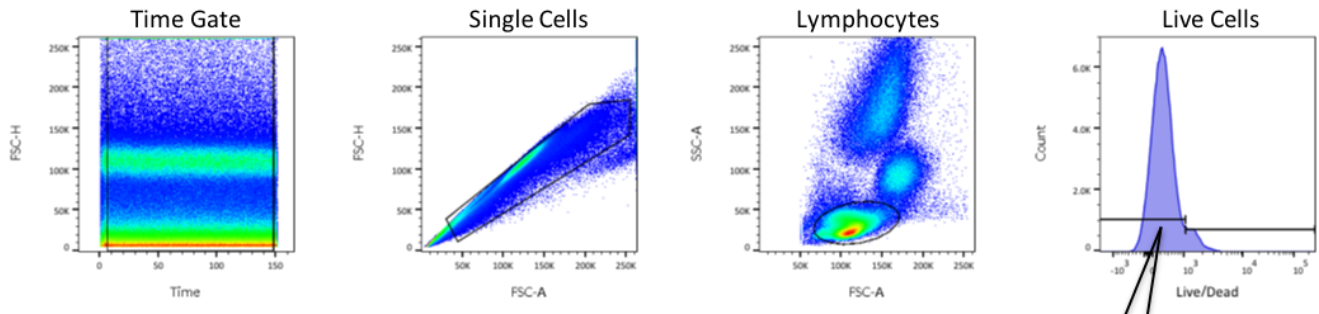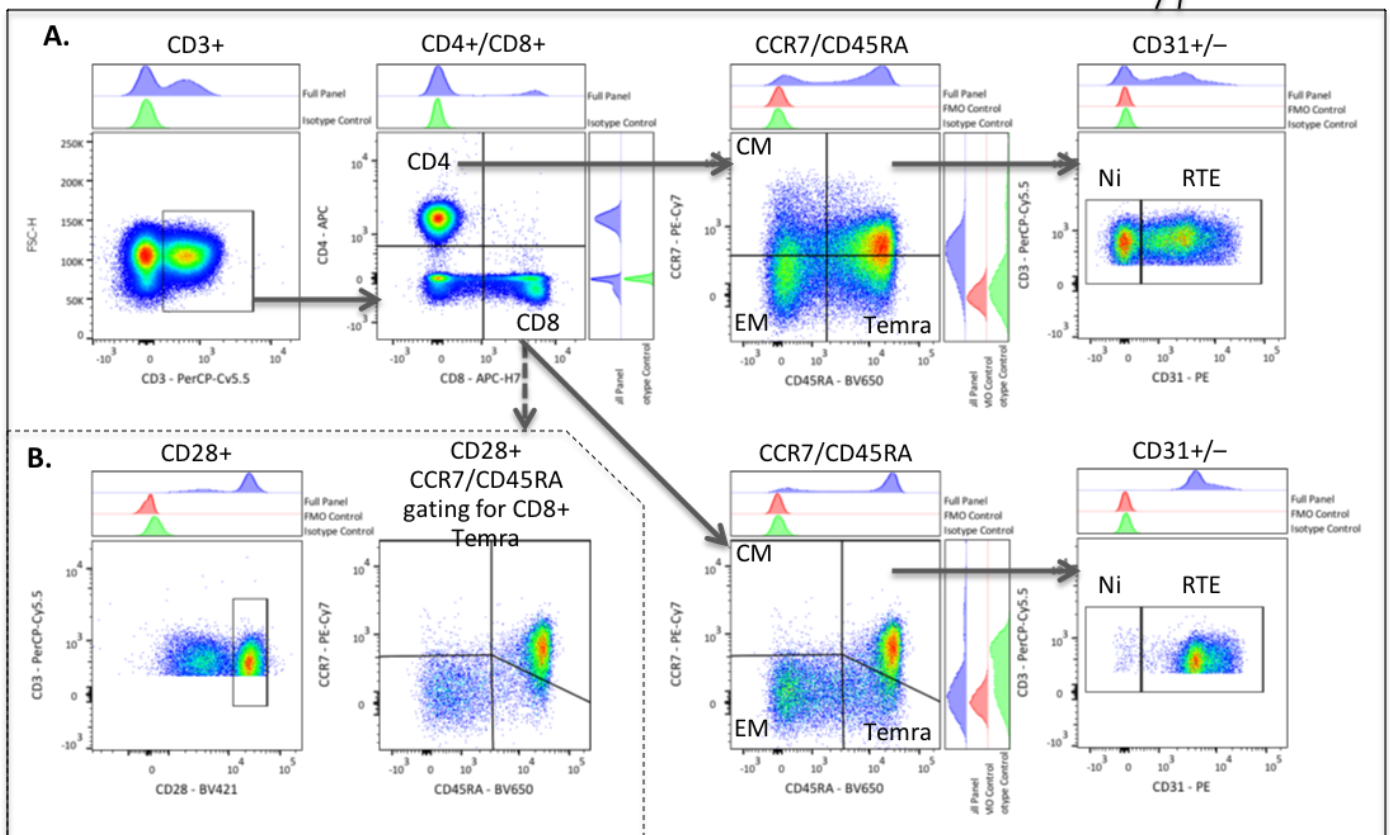

**Supplementary Figure 1 – Gating strategy for T-cell subset identification** This figure identifies T-cell subsets through gating flow cytometry data by time, single cells and size as measured by FSC and SSC values followed by exclusion of dead cells. **A.** Shows the identification of T cells through CD3<sup>+</sup> expression, then helper (CD4<sup>+</sup>) and cytotoxic (CD8<sup>+</sup>) subsets. Memory/maturation stages of CD4 and CD8 T-cell populations are then defined; recent thymic emigrants (RTE; CCR7<sup>+</sup>CD45RA<sup>+</sup>CD31<sup>+</sup>), naïve (Ni; CCR7<sup>+</sup>CD45RA<sup>+</sup>CD31<sup>-</sup>), central memory (CM; CCR7<sup>+</sup>CD45RA<sup>-</sup>), effector memory (EM; CCR7<sup>-</sup>CD45RA<sup>-</sup>), and terminally differentiated CD45RA expressing T cells (Temra; CCR7<sup>-</sup>CD45RA<sup>+</sup>). **B.** Illustrates gating validation for CD8<sup>+</sup> T cells; the Temra population gate (CCR7<sup>-</sup>CD45RA<sup>+</sup>) was defined by gating on CD28<sup>+</sup> CD8 T cells only as expression of this surface marker is lost in the maturation to this stage in cytotoxic T cells. Control comparisons are shown in accompanying axis histogram overlays with the full panel on top in blue, FMO controls in the middle in red, and isotype controls on the bottom in green.

### Stem Memory-Like T-cell Panel and Controls

| BV650  | BV605 | BV421 | Amcyan    | FITC | PE    | APC  | PE-CF594 | PE-Cy7 | PerCP-Cy5.5 | APC-H7 |
|--------|-------|-------|-----------|------|-------|------|----------|--------|-------------|--------|
| CD45RA | CD4   | CD122 | Live/Dead | CD27 | CD62L | CD95 | CD45RO   | CCR7   | CD3         | CD8    |

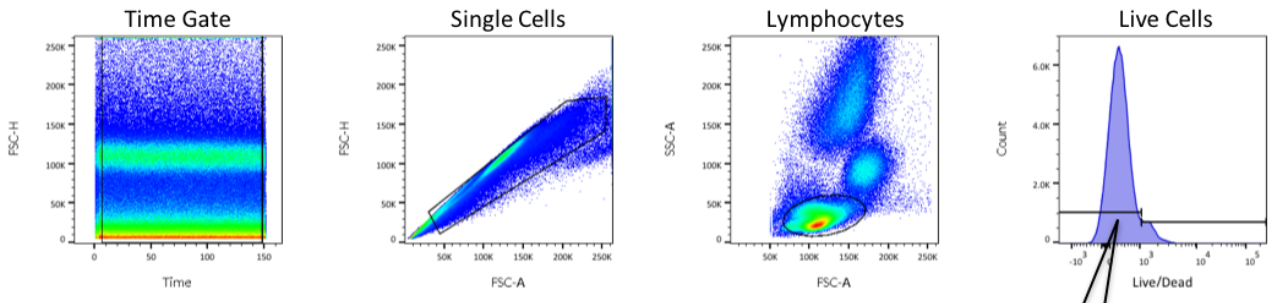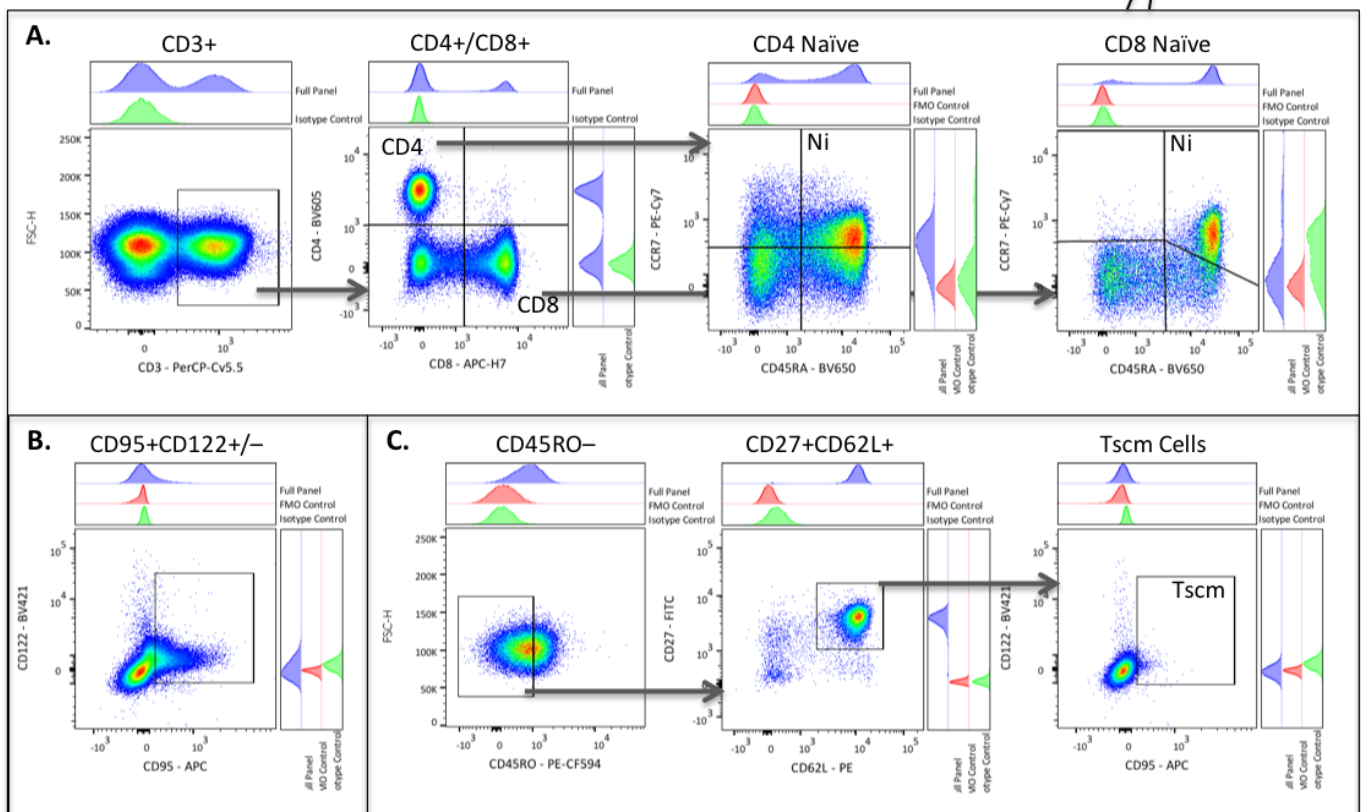

**Supplementary Figure 2 – Gating strategy for Tscm cell identification** Stem memory-like T-cell (Tscm) subsets were identified through gating flow cytometry data by time, single cells and size as measured by FSC and SSC values followed by exclusion of dead cells. **A.** Shows the identification of T cells through CD3+ expression, then helper (CD4+) and cytotoxic (CD8+) subsets, and finally defines naïve T cells (Ni) as CCR7+CD45RA+. **B.** Shows the CD95+CD122+/- gate created on total T cells to validate later Tscm gating. **C.** Shows gating for either CD4 or CD8 Ni subsets, where the Tscm population is defined as CD45RO-CD27+CD62L+CD95+. Control comparisons are shown in accompanying axis histogram overlays with the full panel on top in blue, FMO controls in the middle in red, and isotype controls on the bottom in green.

## Tscm Compensation Matrix

Show All

- APC-A
- APC-H7-A
- AmCyan-A
- BV 421-A
- BV 605-A
- BV 650-A
- FITC-A
- PE-A
- PE-CF594-A
- PE-Cy7-A
- PerCP-Cy5-5-A

|               | APC-A  | APC-H7-A | AmCyan-A | BV 421-A | BV 605-A | BV 650-A | FITC-A | PE-A    | PE-CF594-A | PE-Cy7-A | PerCP-Cy5-5-A |
|---------------|--------|----------|----------|----------|----------|----------|--------|---------|------------|----------|---------------|
| APC-A         | 100    | 22.8905  | -0.1669  | -0.1441  | 0.1078   | 23.2737  | 0      | 0       | 0.0359     | 0.4133   | 1.8011        |
| APC-H7-A      | 0.5478 | 100      | -0.1884  | 0.8208   | 0.0456   | 0.1597   | 0      | 0       | 0          | 1.8963   | 0.0228        |
| AmCyan-A      | 0.6646 | 0.4652   | 100      | 16.4611  | 9.9727   | 3.4661   | 4.9727 | 3.4704  | 2.7978     | 0.2658   | 1.0636        |
| BV 421-A      | 0      | 0        | 6.7578   | 100      | 0.1175   | 0.0238   | 0.0012 | 0       | 0          | 0        | 0             |
| BV 605-A      | 0.0605 | 0.0181   | 0.8112   | 10.3209  | 100      | 43.4319  | 0      | 0.6125  | 7.7585     | 0.3994   | 1.6465        |
| BV 650-A      | 5.1059 | 1.5664   | 1.9995   | 21.7998  | 14.6404  | 100      | 0.0241 | 0.0386  | 0.2268     | 0.0964   | 0.6197        |
| FITC-A        | 0      | 0        | 6.4321   | 0        | 0.2673   | 0.0562   | 100    | 22.1222 | 7.9507     | 0.1265   | 0.7043        |
| PE-A          | 0.0046 | 0.0046   | 0.1541   | 0        | 3.4104   | 0.795    | 0.7673 | 100     | 41.9384    | 0.7398   | 4.8722        |
| PE-CF594-A    | 0.098  | 0.0413   | 0        | 0        | 7.6695   | 2.3584   | 0.1045 | 5.6713  | 100        | 3.8149   | 19.9838       |
| PE-Cy7-A      | 0      | 8.2803   | 0        | 0        | 0.0533   | 0.0097   | 0.2328 | 1.7266  | 0.7566     | 100      | 0.2473        |
| PerCP-Cy5-5-A | 1.8322 | 5.7267   | -0.3437  | 1.0265   | 0.0555   | 5.9014   | 0      | 0.0555  | 0.2218     | 26.4071  | 100           |

## CD4 and CD8 Dot Plot FMO Gating

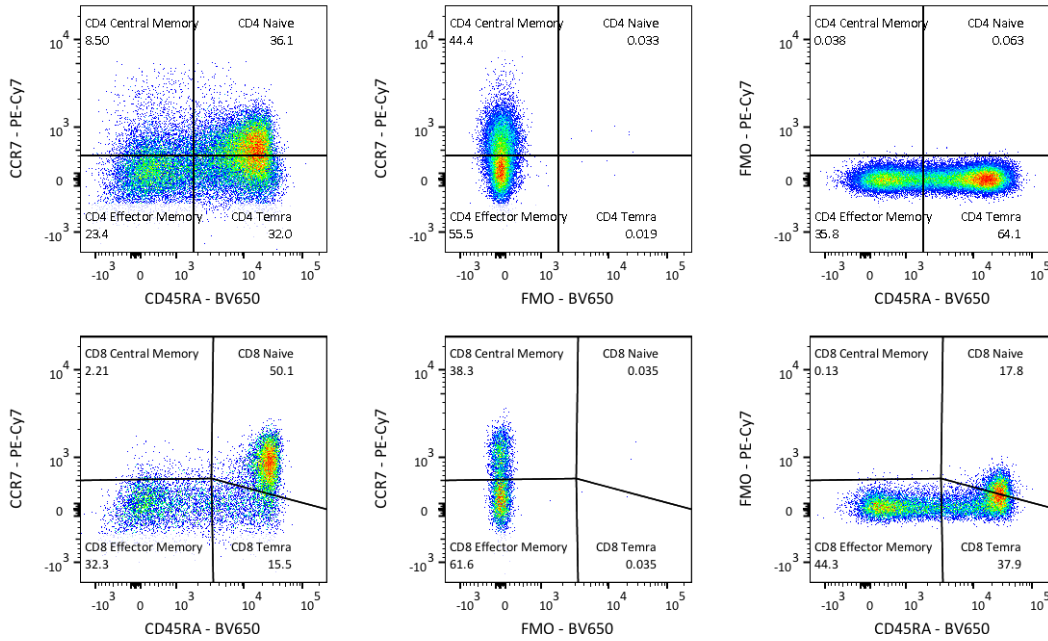

## CD4 and CD8 Gating with CD62L Colour Map

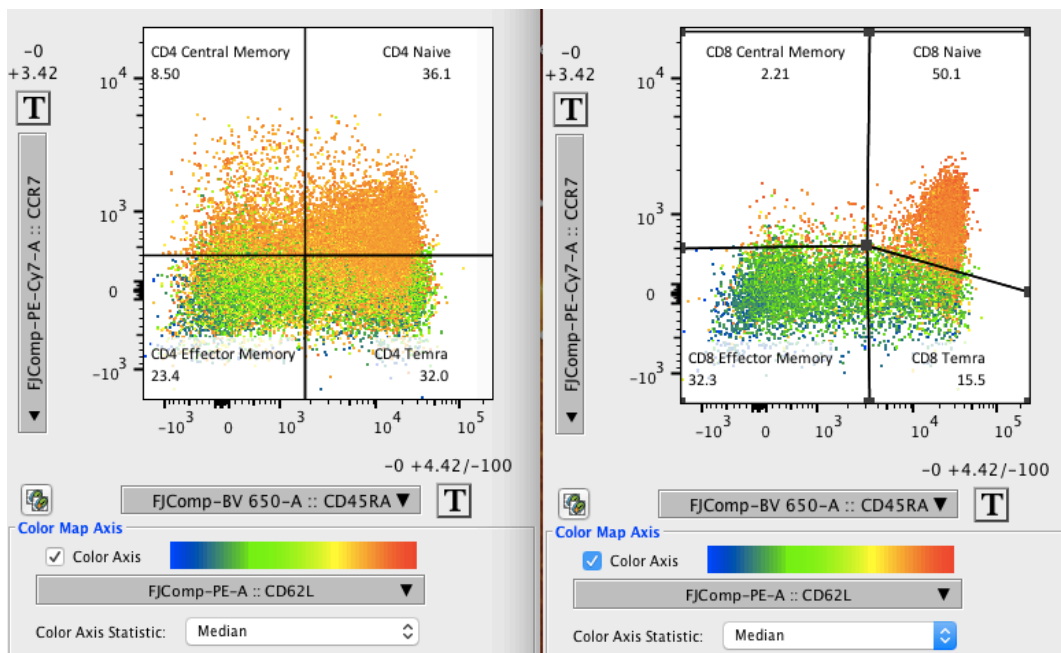

**Supplementary Figure 3 – Tscm panel memory subset gating validation** A representative compensation matrix, CCR7 and CD45RA fluorescence minus one dot plots, and CCR7/CD45RA gating with CD62L colour mapped to support definition of T-cell memory subset gates are shown.

## Supplementary Information 1 – R code used to perform Spearman’s correlation and generate correlograms

```
# Load packages required
library(readxl)
library(corrplot)
library(psych)

# Load data
resPP <- as.data.frame(read_excel("File Location"))

# Define columns for analysis
resPP3 <- resPP[,2:44]

# Run Spearman’s correlation to generate correlation matrix
PPcor3 <- corr.test(resPP3,use="pairwise.complete.obs", method = "spearman", adjust = "none")

# Define p-values and r-values for corrplot
pmaT3 <- PPcor3$p
M3 <- PPcor3$r

# Generate correlogram using corrplot package
corrplot(M3[1:8,], order="original", col=colorRampPalette(c("blue","white","red"))(200), p.mat = pmaT3,
sig.level = 0.05, insig="blank",tl.cex = 0.7, tl.col="black", addgrid.col="white")

# Save p-values and r-values as .csv files
write.csv(PPcor3$p, file = "PPcorPvaluenotadjusted.csv")
write.csv(PPcor3$r, file = "PPcorRvaluenotadjusted.csv")

# Repeat of procedure for second study group
resPnP <- as.data.frame(read_excel("File Location"))
resPnP3 <- resPnP[,2:43]
PnPcor3 <- corr.test(resPnP3,use="pairwise.complete.obs", method = "spearman", adjust = "none")
pmaT3PnP <- PnPcor3$p
M3PnP <- PnPcor3$r
corrplot(M3PnP[1:8,1:42], order="original", col=colorRampPalette(c("blue","white","red"))(200), p.mat =
pmaT3PnP, sig.level = 0.05, insig="blank",tl.cex = 0.7, tl.col="black", addgrid.col="white")
write.csv(PnPcor3$p, file = "PnPcorPvaluenotadjusted.csv")
write.csv(PnPcor3$r, file = "PnPcorRvaluenotadjusted.csv")
```

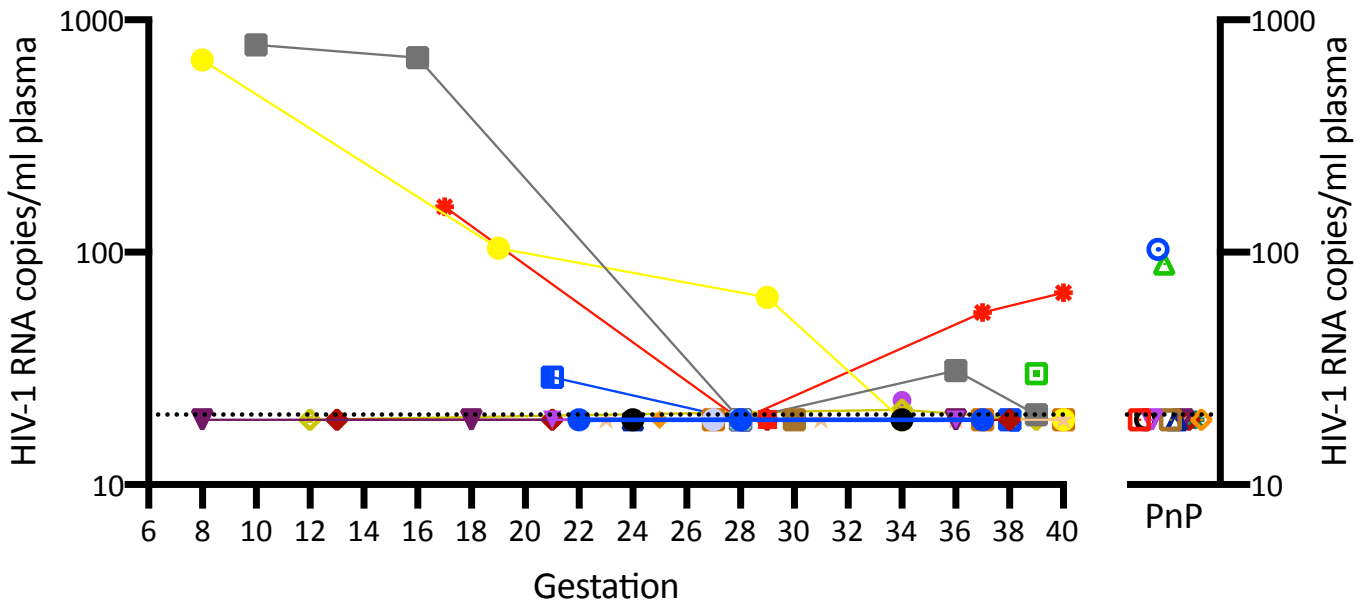

**Supplementary Figure 4 – HIV-1 RNA plasma loads of both study groups** This graph shows the HIV-1 RNA copies/ml plasma with gestation week for the pregnant group, and separated on the right hand side are the cross-sectional viral loads from the HIV-1 positive non-pregnant participants. Participant samples are individually shaped, coloured, and are connected by lines to show changes during their time on the study. The dotted line at 20 copies/ml plasma denotes the limit of detectability of the assay. Four pregnant women who had detectable HIV-1 plasma RNA became undetectable during longitudinal follow up, two of which became detectable again after 28 weeks gestation. Two of the non-pregnant group had detectable viral loads.

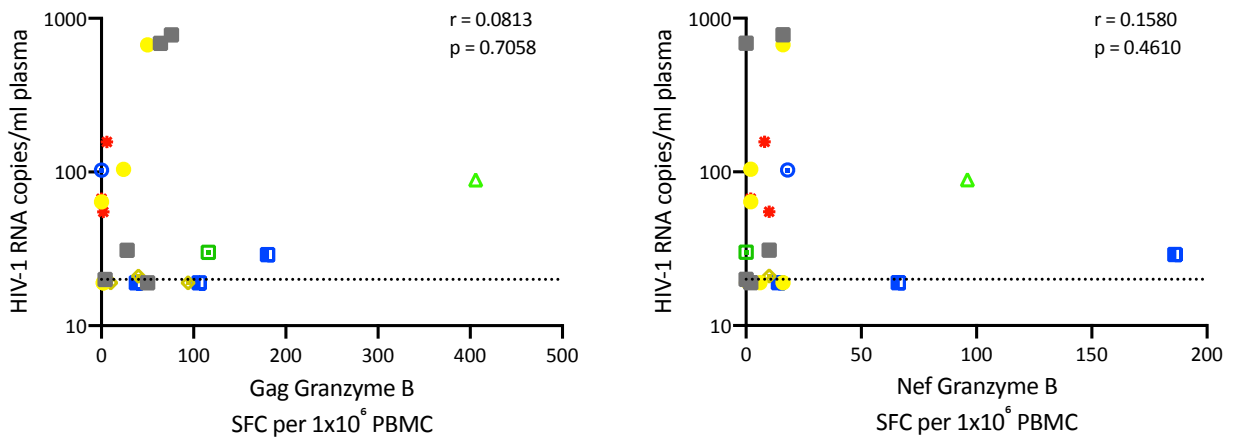

**Supplementary Figure 5 – Gag and Nef granzyme B response correlations to plasma HIV-1 RNA of detectable study participants** These graphs show Spearman's correlations of either Gag or Nef granzyme B responses against HIV-1 RNA. Study participants who had detectable plasma viral loads during the study from both pregnant and non-pregnant groups were combined to explore the potential association between their viral load and granzyme B responses. Participant samples are individually shaped and coloured. The dotted line at 20 copies/ml plasma denotes the limit of detectability of the assay. While Spearman's correlation cannot adjust for repeated measures from the same participants neither analysis identified an association between the viral load of study participants with detectable plasma HIV-1 RNA and either Gag or Nef granzyme B response.
